# Supplementary material for: Acid tolerant covalently functionalized graphene oxide for the selective extraction of Pd from high-level radioactive liquid wastes
Source: Royal Society of Chemistry journal article supplement (doi:10.1039/c8ta09849b), 2019-01-01
Supplement: c8ta09849b1.pdf [file c8ta09849b1.pdf]

### Supplementary Information

#### **Acid tolerant covalently functionalized graphene oxide for the selective extraction of Pd from high-level radioactive liquid wastes**

Kancharla Srinivasarao, and Keiko Sasaki\*

*Department of Earth Resources Engineering, Faculty of Engineering, Kyushu University,  
Fukuoka 819-0395, Japan*

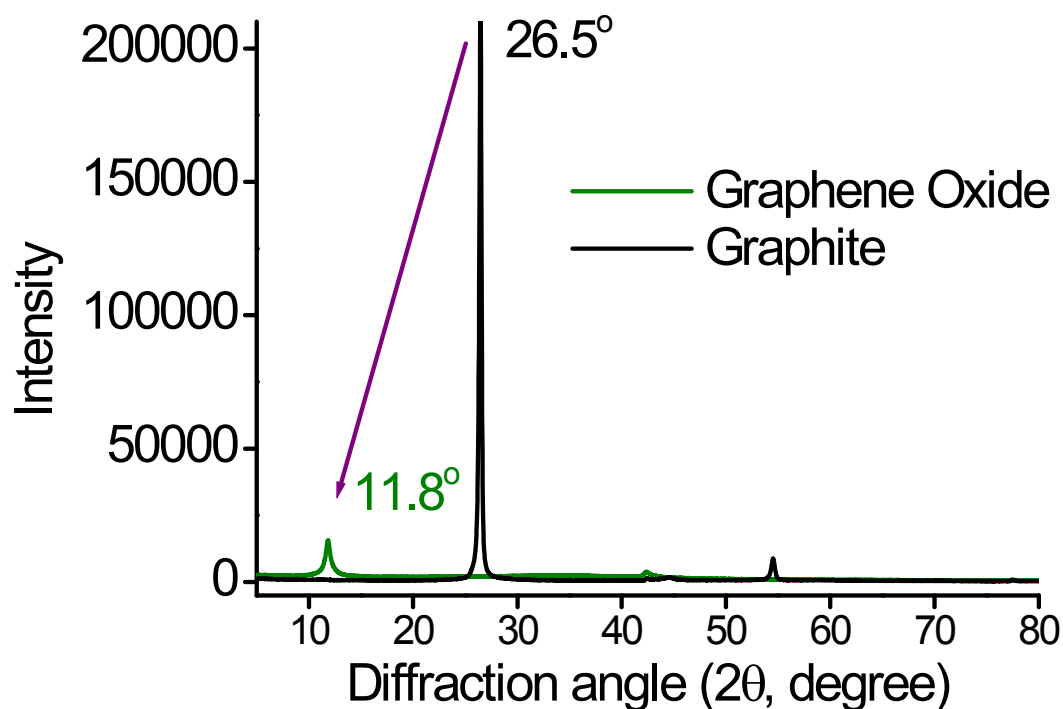

**Fig. S1.** XRD patterns of graphite and graphene oxide.
